# Supplementary material for: WNK1 regulates uterine homeostasis and its ability to support pregnancy
Source: JCI journal article supplement (doi:10.1172/jci.insight.141832), 2020-10-13

# **WNK1 Regulates Uterine Homeostasis and its Ability to Support Pregnancy**

141832-JCI-RG-1

Chi et al., 2020

Supplemental Figures

Figure S1

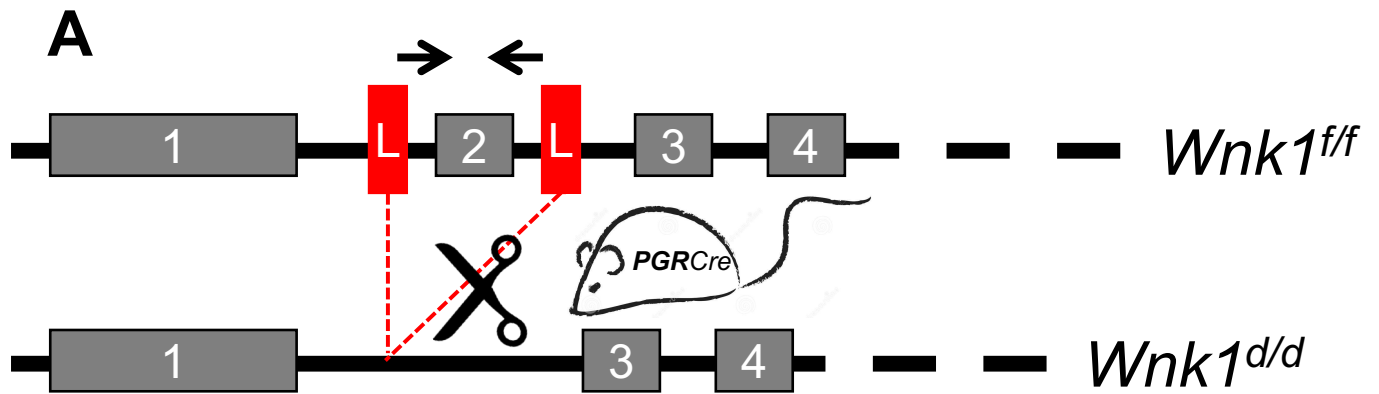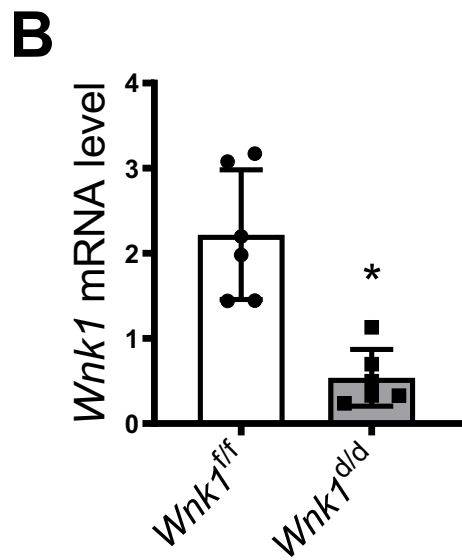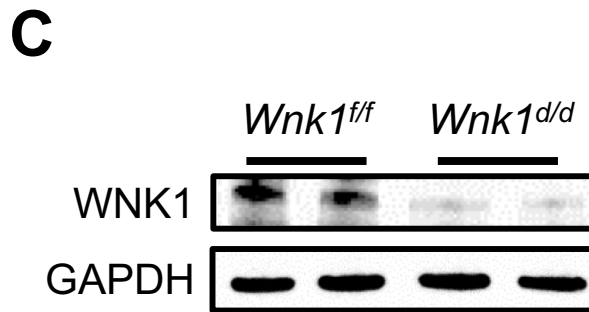

Figure S2

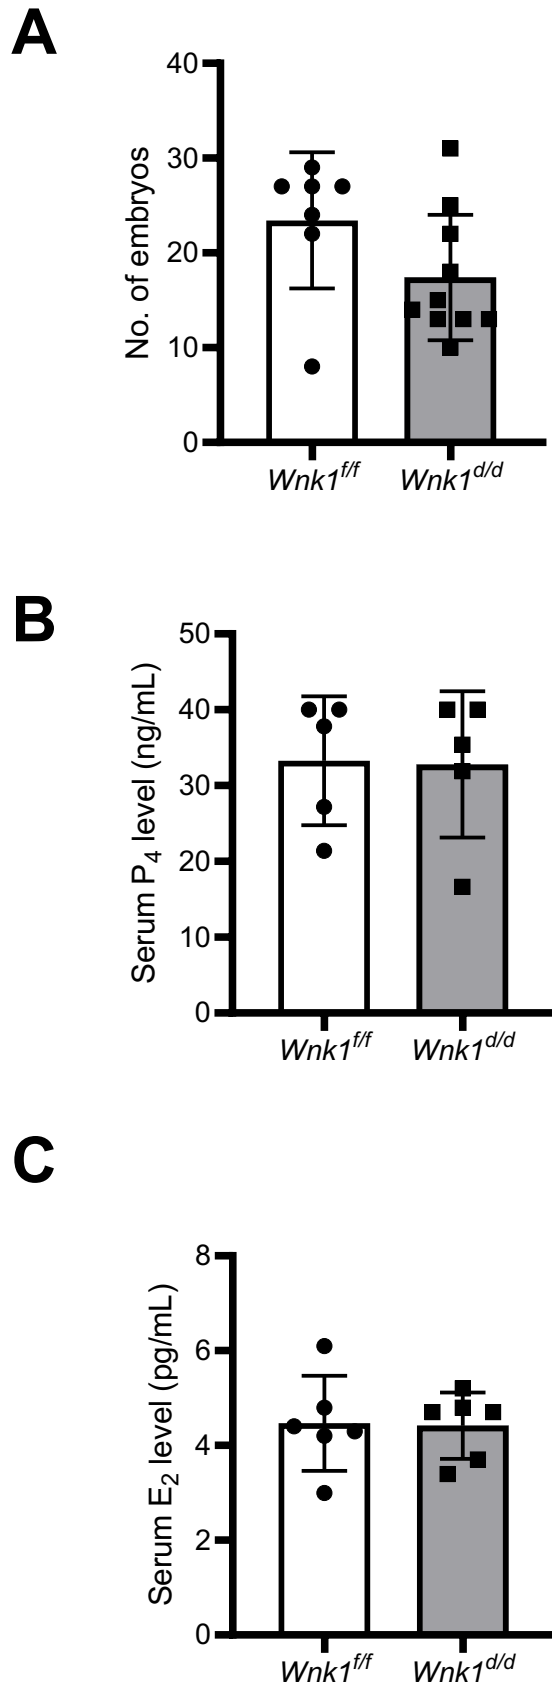

Figure S3

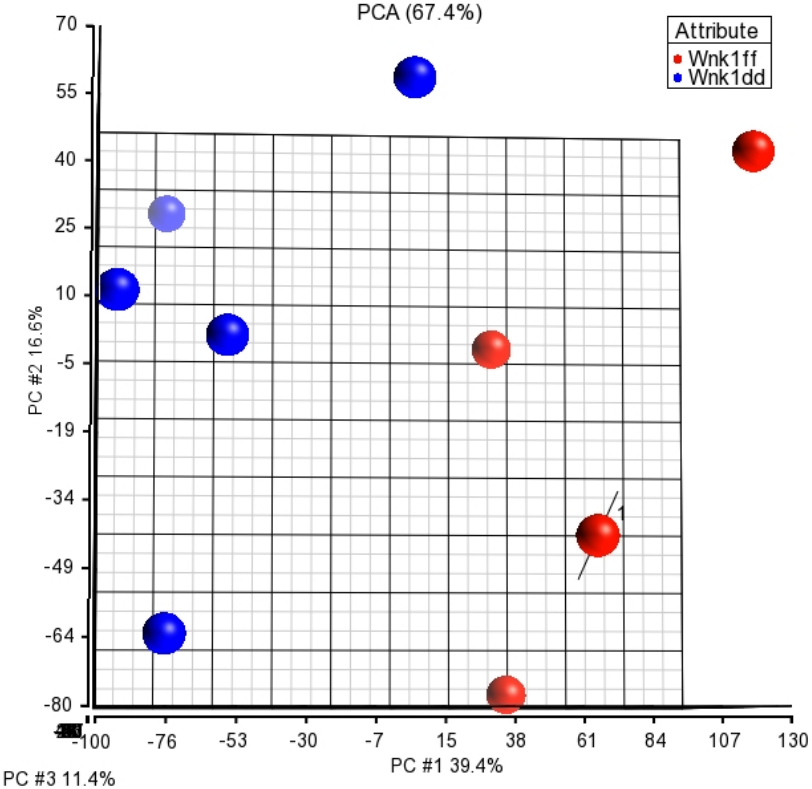

Figure S4

**A**

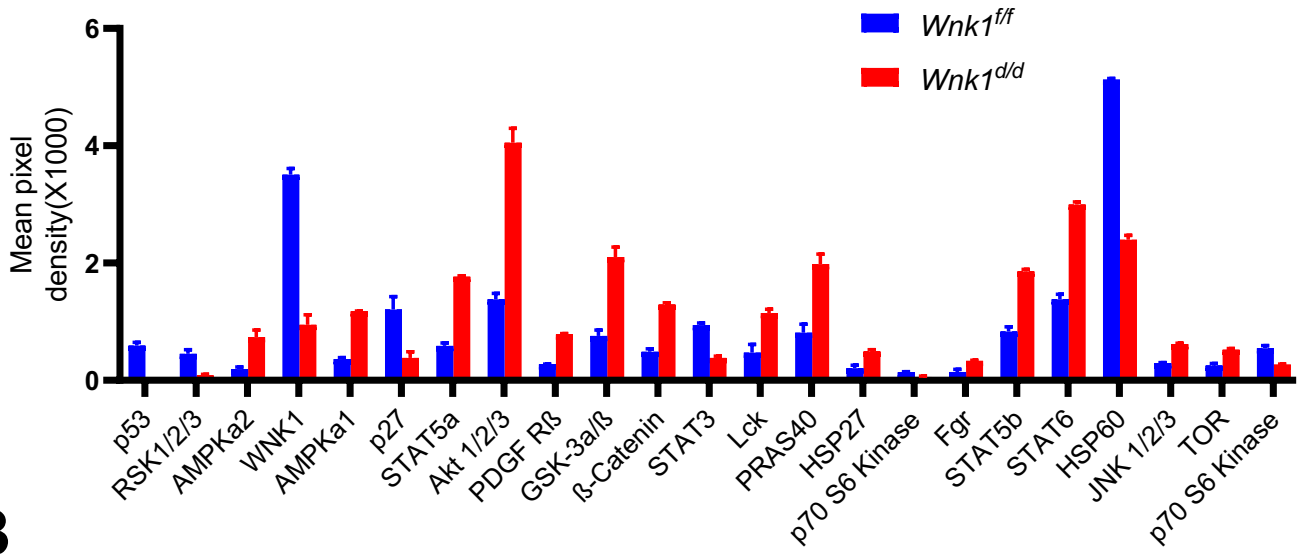

**B**

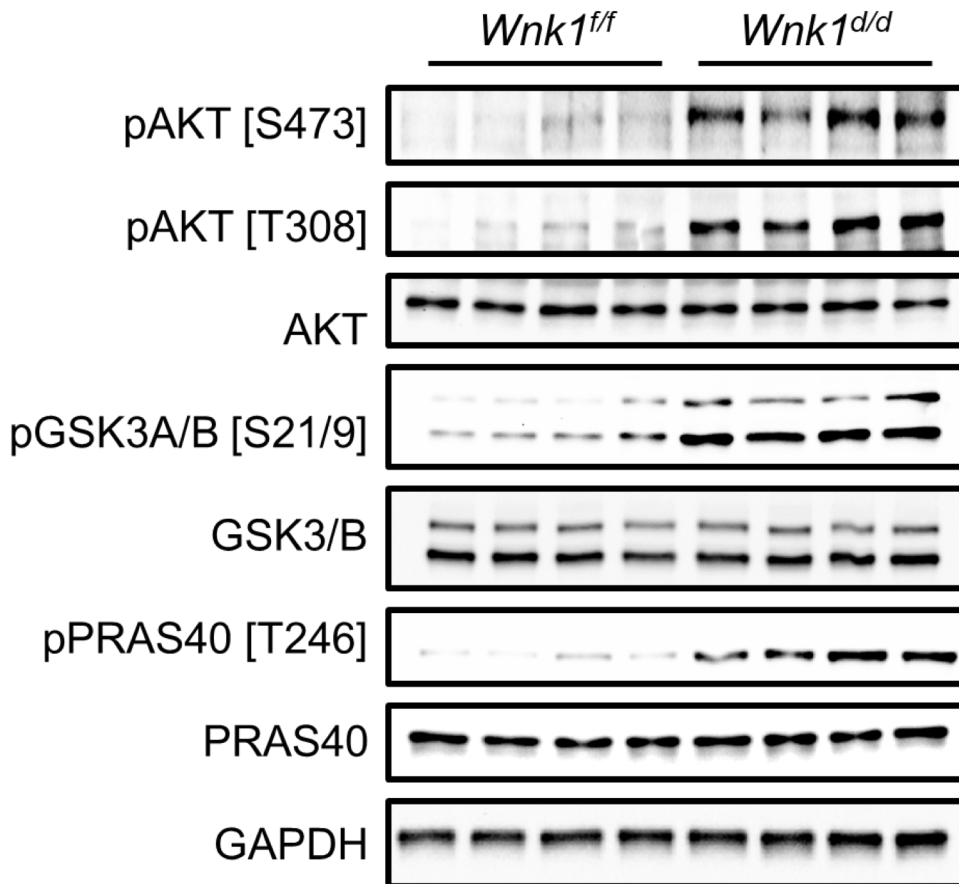

**Figure S5**

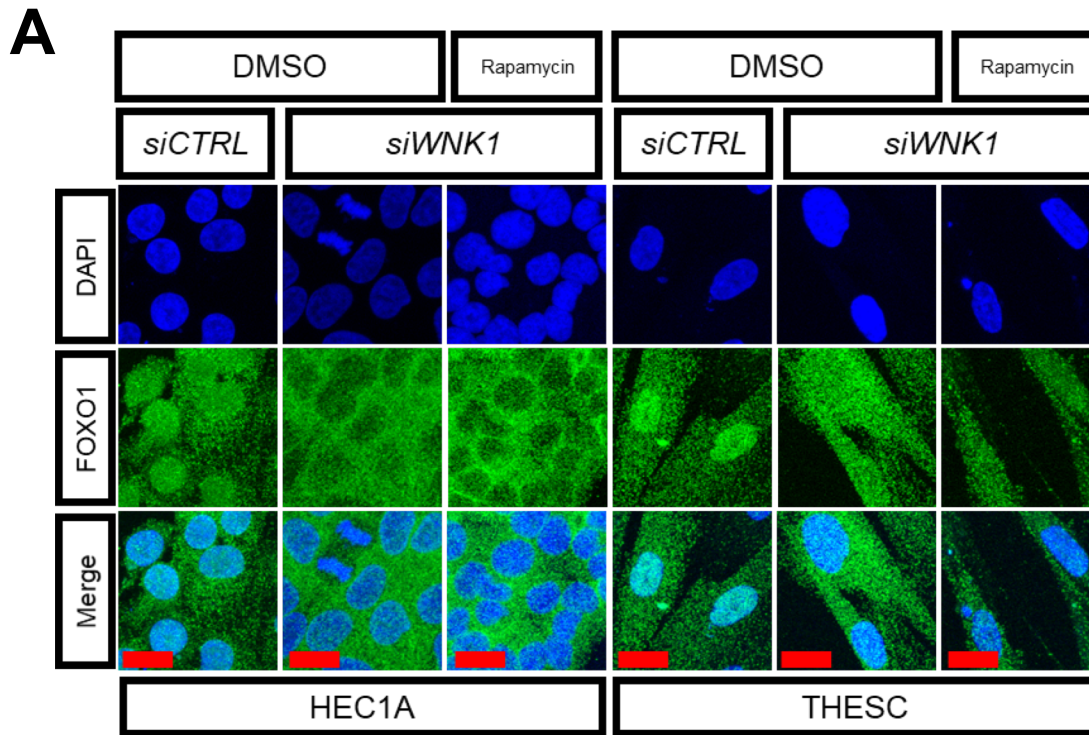

**B**

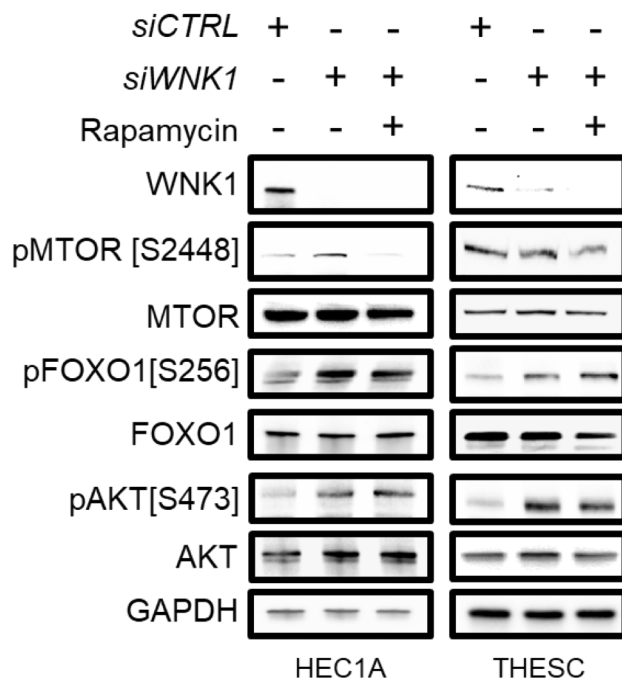

**C**

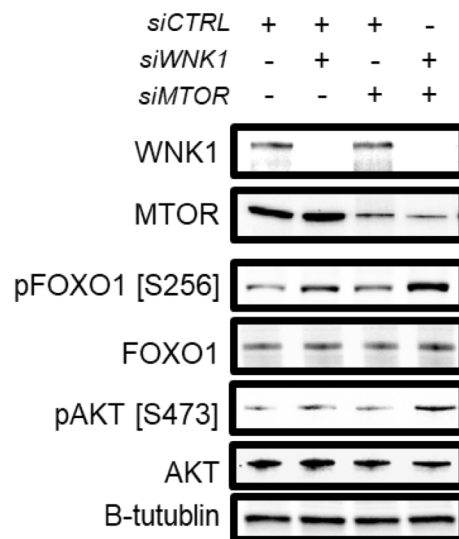

Figure S6

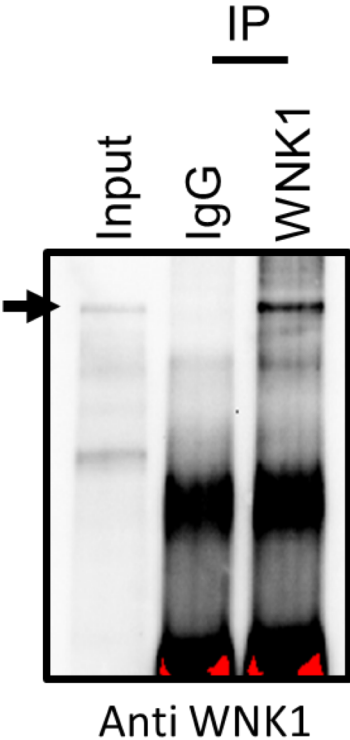

**Figure S7**

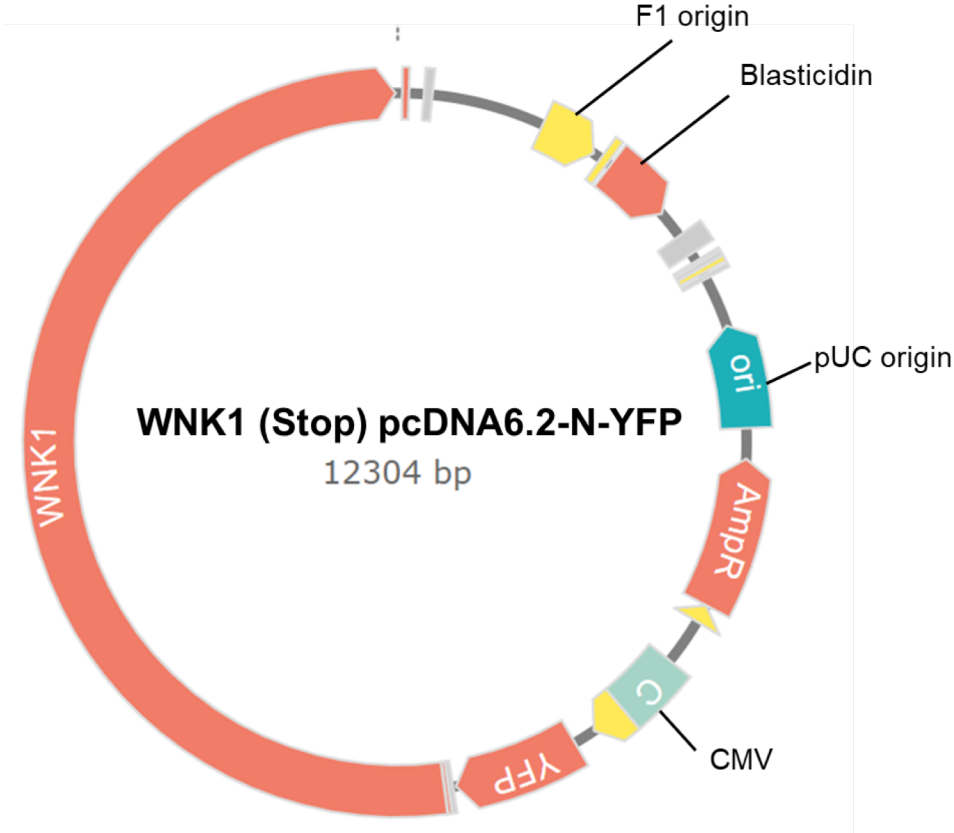

Supplement: sd1 [file 1]
